# Supplementary material
Source: publisher figshare collection journal article supplement (https://gsapubs.figshare.com/ndownloader/files/34470371)
Supplement: Supplementary file 1 [file 34470371]

## Sheet: Figure 4 data
LITERATURE DATA	RED = DATA FROM THE LITERATURE; GREEN=CALCULATED/INFERRED IN THIS STUDY
Data source	State/Province, Country	Unit/ Pluton	Sample name	Latitude	Longitude	Zircon Saturation Temperature (ZST) in °C	Fe2O3	FeO	FeO(t)	Log10(Fe2O3/FeO)	Redox state (classification from Blevin, 2004)	Averaged data (based on redox state) for same pluton
Rasmussen (2013)	NWT, Canada	O'Grady batholith	KR-05-97b	62.9459	-128.713	790	1.23	2.82	4.37	-0.360344	Moderately oxidized
Rasmussen (2013)	NWT, Canada	Hole-in-the-Wall batholith	KR-05-198	61.615	-127.182	860	0.27	3.08	3.7	-1.05719	Moderately reduced
Rasmussen (2013)	NWT, Canada	Pelly River pluton	KR-05-76	62.7649	-129.642	786	7.2	2.37	9.84	0.482584	Very strongly oxidized
Rasmussen (2013)	NWT, Canada	Mount Christie pluton	KR-05-62	62.9935	-129.48	786	0.36	4.22	5.06	-1.06901	Moderately reduced
Rasmussen (2013)	NWT, Canada	Central Nahanni pluton	KR-05-130	62.6869	-128.628	813	0.44	3.32	4.14	-0.877685	Moderately reduced
Rasmussen (2013)	NWT, Canada	North Nahanni pluton	KR-05-136	62.7739	-128.644	827	0.54	2.81	3.67	-0.716313	Moderately reduced
Rasmussen (2013)	NWT, Canada	Mount Wilson pluton	KR-05-68	62.8915	-129.686	851	0.2	2.56	3.05	-1.10721	Strongly reduced
Rasmussen (2013)	NWT, Canada	Jorgensen pluton	KR-05-08	60.8717	-126.292	781	0.35	3.27	3.99	-0.97048	Moderately reduced
Rasmussen (2013)	NWT, Canada	Park pluton	KR-05-43	61.4714	-126.431	800	1.54	2.63	4.47	-0.232435	Moderately oxidized
Rasmussen (2013)	NWT, Canada	Coal River batholith	KR-05-196	61.5434	-127.238	827	0.77	2.37	3.41	-0.488258	Moderately reduced
Rasmussen (2013)	NWT, Canada	Roy pluton	KR-05-22	61.5818	-127.665	843	0.81	1.34	2.3	-0.21862	Moderately oxidized
Rasmussen (2013)	NWT, Canada	Fish pluton	KR-05-26	61.6275	-127.492	842	0.55	1.34	2.04	-0.386742	Moderately oxidized
Rasmussen (2013)	NWT, Canada	Faille pluton	0.3M-216	62.1913	-127.659		0.53	2.65	3.49	-0.69897	Moderately reduced
Rasmussen (2013)	NWT, Canada	Mount Sir James McBrien pluton	0.3M-217	62.0981	-127.691		0.83	2.34	3.44	-0.450138	Moderately reduced
Rasmussen (2013)	NWT, Canada	Hole-in-the-Wall batholith	KR-05-164	61.7361	-127.355	826	0.16	1.53	1.86	-0.980571	Moderately reduced
Rasmussen (2013)	NWT, Canada	Cac pluton	KR-05-110	62.3692	-128.549	833	0.22	2.57	3.08	-1.06751	Moderately reduced
Rasmussen (2013)	NWT, Canada	Lened pluton	KR-05-175	62.3803	-128.647	843	0.29	2.57	2.86	-0.947535	Strongly reduced
Rasmussen (2013)	NWT, Canada	Mine Stock (Cantung pluton)	03M-207	61.9662	-128.229		0.08	2.39	2.75	-1.47531	Strongly reduced
Rasmussen (2013)	NWT, Canada	Circular Stock pluton	KR-05-143	61.9642	-128.248	832	0.2	2.06	2.49	-1.01284	Moderately reduced
Rasmussen (2013)	NWT, Canada	Little Hyland pluton	KR-05-208	61.615	-127.182	832	0.01	1.92	2.15	-2.2833	Strongly reduced
Rasmussen (2013)	NWT, Canada	Rifle Range pluton	KR-05-148	62.0035	-128.166	835	0.11	1.8	2.11	-1.21388	Strongly reduced
Rasmussen (2013)	Yukon, Canada	Ivo pluton	KR-05-32	61.0519	-127.107	871	0.14	1.02	1.28	-0.862472	Moderately reduced
Rasmussen (2013)	Yukon, Canada	Marion pluton	KR-05-191	61.3927	-127.341	836	0.2	1.93	2.35	-0.984527	Moderately reduced
Rasmussen (2013)	Yukon, Canada	Powers pluton	KR-05-10	60.7962	-126.08	781	1.13	3.14	4.63	-0.443851	Moderately oxidized
Rasmussen (2013)	Yukon, Canada	Coal River batholith	KR-05-194	61.3705	-127.239	870	0.34	2.31	2.91	-0.832133	Moderately reduced
Rasmussen (2013)	Yukon, Canada	Nahanni Range pluton	KR-05-210	61.9167	-128.407	845	0.18	1.41	1.75	-0.893947	Moderately reduced
Hart et al. (2004)	Yukon, Canada	Dublin Gulch (main phase)	Main phase	64.021	-135.822	781	0.57	2.5	3.01289	-0.642065	Moderately reduced
Hart et al. (2004)	Yukon, Canada	Dublin Gulch (Quartz Syenite)	Quartz syenite	64.038	-135.778	790	0.5	1.4	1.8499	-0.447158	Moderately reduced
Hart et al. (2004)	Yukon, Canada	Mactung	Main phase	63.2822	-130.153	797	0.63	2.9	3.46687	-0.663057	Moderately reduced
Bateman et al. (1965)	CA, USA	Inconsolable granodiorite	6	37.12	-118.53		1.86	4.06	5.73363	-0.339013	Moderately oxidized
Bateman et al. (1965)	CA, USA	Tinemaha granodiorite	10	37.05	-118.43		2.59	3.17	5.50048	-0.0877595	Strongly oxidized
Bateman et al. (1965)	CA, USA	Granodiorite of McMurray Meadows	9	37.41	-118.7		1.9	2.52	4.22962	-0.122647	Strongly oxidized
Bateman et al. (1965)	CA, USA	Wheeler Crest quartz monzonite	11	37.08	-118.36		1.03	1.38	2.30679	-0.127042	Moderately oxidized
Bateman et al. (1965)	CA, USA	Round Valley Peak granodiorite	5	37.46	-118.7		2.35	3.25	5.36453	-0.140815	Strongly oxidized
Bateman et al. (1965)	CA, USA	Lamarck granodiorite	22	37.62	-118.7		1.45	2.52	3.82471	-0.240033	Moderately oxidized
Bateman et al. (1965)	CA, USA	Tungsten Hills quartz monzonite 1	5	37.36	-118.72		0.89	1.03	1.83082	-0.0634472	Moderately oxidized
Bateman et al. (1965)	CA, USA	Tungsten Hills quartz monzonite 2	52	37.24	-118.56		1.07	1.99	2.95279	-0.269469	Moderately oxidized
Bateman et al. (1965)	CA, USA	Cathedral Peak quartz monzonite 1	4 (b)	37.35	-118.74		1	0.65	1.5498	0.187087	Strongly oxidized
Bateman et al. (1965)	CA, USA	Cathedral Peak quartz monzonite 2	12 (b)	37.26	-118.64		0.4	0.34	0.69992	0.0705811	Strongly oxidized
Bateman et al. (1965)	CA, USA	Cathedral Peak quartz monzonite 3	23 (a)	37.11	-118.48		0.6	0.88	1.41988	-0.166331	Moderately oxidized
Bateman et al. (1965)	CA, USA	Cathedral Peak alaskite 1	37 (b)	37.24	-118.4		0.9	0.81	1.61982	0.0457575	Strongly oxidized
Bateman et al. (1965)	CA, USA	Cathedral Peak alaskite 2	46 (b)	37.18	-118.42		0.3	0.74	1.00994	-0.39211	Moderately reduced
												Averaged data (based on redox state) for same pluton
												Unit name for averaged data	Redox state	Sample %	Average ZST (°C)
From here, compilation source: Chapman et al. (2021)
G. Haxel (unpublished)	AZ, USA	Artesa Hills	SP152	31.8442	-112.71	697.951	0.2146	0.14	0.333097	0.185502	Moderately oxidized	Artesa Hills 1	Moderately oxidized	33.3333	697.951
G. Haxel (unpublished)	AZ, USA	Artesa Hills	SP76	31.8442	-112.71	728.157	0.1528	0.52	0.657489	-0.53188	Moderately reduced	Artesa Hills 2	Moderately reduced	33.3333	728.157
G. Haxel (unpublished)	AZ, USA	Artesa Hills	SP78	31.8442	-112.71	721.977	0.2801	0.09	0.342034	0.493071	Strongly oxidized	Artesa Hills 3	Strongly oxidized	33.3333	721.977
G. Haxel (unpublished)	AZ, USA	Comobabi	CB64	32.05	-112.86	653.925	0.2679	0.11	0.351056	0.38658	Strongly oxidized	Comobabi	Strongly oxidized	100	653.925
G. Haxel (unpublished)	AZ, USA	Pan-Tak pluton	CM131B	32	-111.58	749.725	0.47	0.37	0.792906	0.103896	Strongly oxidized	Pan-Tak 1	Strongly oxidized	78.5714	737.662
G. Haxel (unpublished)	AZ, USA	Pan-Tak pluton	CM131A	32	-111.58	770.648	0.66	0.59	1.18387	0.0486919	Strongly oxidized	Pan-Tak 2	Moderately oxidized	7.14286	692.176
G. Haxel (unpublished)	AZ, USA	Pan-Tak pluton	BG81	32	-111.58	762.813	0.61	0.58	1.12888	0.0219018	Strongly oxidized	Pan-Tak 3	Moderately reduced	14.2857	693.044
G. Haxel (unpublished)	AZ, USA	Pan-Tak pluton	CM602	32	-111.58	667.874	0.11	0.32	0.418978	-0.463757	Moderately reduced
G. Haxel (unpublished)	AZ, USA	Pan-Tak pluton	PR362A	32	-111.58	745.421	0.38	0.37	0.711924	0.0115819	Strongly oxidized
G. Haxel (unpublished)	AZ, USA	Pan-Tak pluton	BG82	32	-111.58	771.484	0.71	0.34	0.978858	0.319779	Strongly oxidized
G. Haxel (unpublished)	AZ, USA	Pan-Tak pluton	CM152	32	-111.58	742.515	0.51	0.23	0.688898	0.345842	Strongly oxidized
G. Haxel (unpublished)	AZ, USA	Pan-Tak pluton	BG90	32	-111.58	718.213	0.06	0.49	0.543988	-0.912045	Moderately reduced
G. Haxel (unpublished)	AZ, USA	Pan-Tak pluton	PUP14	32	-111.58	772.014	0.59	0.28	0.810882	0.323694	Strongly oxidized
G. Haxel (unpublished)	AZ, USA	Pan-Tak pluton	CM117	32	-111.58	665.097	0.42	0.14	0.517916	0.477121	Strongly oxidized
G. Haxel (unpublished)	AZ, USA	Pan-Tak pluton	BG85	32	-111.58	712.539	0.3	0.21	0.47994	0.154902	Strongly oxidized
G. Haxel (unpublished)	AZ, USA	Pan-Tak pluton	CM601	32	-111.58	726.171	0.42	0.29	0.667916	0.160851	Strongly oxidized
G. Haxel (unpublished)	AZ, USA	Pan-Tak pluton	BG84	32	-111.58	692.176	0.11	0.22	0.318978	-0.30103	Moderately oxidized
G. Haxel (unpublished)	AZ, USA	Pan-Tak pluton	CM134	32	-111.58	695.853	0.14	0.12	0.245972	0.0669468	Strongly oxidized
G. Haxel (unpublished)	AZ, USA	Kupk Hills	WP104	31.94	-112.77	747.783	0.7702	0.18	0.873026	0.631331	Very strongly oxidized	Kupk Hills 1	Very strongly oxidized	50	747.783
G. Haxel (unpublished)	AZ, USA	Kupk Hills	GH119	31.94	-112.77	709.134	0.2835	0.15	0.405093	0.276462	Strongly oxidized	Kupk Hills 2	Strongly oxidized	50	709.134
G. Haxel (unpublished)	AZ, USA	Morena	SP690	31.59	-111.87	721.74	0.669	0.1	0.701966	0.825426	Very strongly oxidized	Morena	Very strongly oxidized	100	721.74
G. Haxel (unpublished)	AZ, USA	Senita Basin pluton	OP109	31.96	-112.85	706.6	0.2403	0.27	0.486222	-0.05061	Moderately oxidized	Senita Basin 1	Very strongly oxidized	25	715.045
G. Haxel (unpublished)	AZ, USA	Senita Basin pluton	OP157	31.96	-112.85	762.856	0.6619	0.71	1.30558	-0.030466	Strongly oxidized	Senita Basin 2	Strongly oxidized	50	736.187
G. Haxel (unpublished)	AZ, USA	Senita Basin pluton	OP140	31.96	-112.85	694.475	0.2834	0.06	0.315003	0.674249	Very strongly oxidized	Senita Basin 3	Moderately oxidized	25	690.806
G. Haxel (unpublished)	AZ, USA	Senita Basin pluton	OP167B	31.96	-112.85	772.331	0.4181	0.29	0.666206	0.158882	Strongly oxidized
G. Haxel (unpublished)	AZ, USA	Senita Basin pluton	OP168	31.96	-112.85	675.012	0.0813	0.17	0.243154	-0.320358	Moderately oxidized
G. Haxel (unpublished)	AZ, USA	Senita Basin pluton	OP188	31.96	-112.85	688.472	0.3789	0.01	0.350934	1.57852	Strongly oxidized
G. Haxel (unpublished)	AZ, USA	Senita Basin pluton	OP156	31.96	-112.85	735.614	0.469	0.1	0.522006	0.671173	Very strongly oxidized
G. Haxel (unpublished)	AZ, USA	Senita Basin pluton	OP177	31.96	-112.85	721.091	0.1601	0.09	0.234058	0.250149	Strongly oxidized
G. Haxel (unpublished)	AZ, USA	Sierra Blanca	PR34	32.11	-112.76	730.816	0.3392	0.28	0.585212	0.0832978	Strongly oxidized	Sierra Blanca 1	Very strongly oxidized	54.5455	689.118
G. Haxel (unpublished)	AZ, USA	Sierra Blanca	PR364	32.11	-112.76	707.342	0.2746	0.14	0.387085	0.292572	Strongly oxidized	Sierra Blanca 2	Strongly oxidized	45.4545	710.122
G. Haxel (unpublished)	AZ, USA	Sierra Blanca	QT125	32.11	-112.76	698.511	0.3746	0.14	0.477065	0.42744	Strongly oxidized
G. Haxel (unpublished)	AZ, USA	Sierra Blanca	PUP6A-B	32.11	-112.76	733.373	0.3024	0.16	0.4321	0.276462	Strongly oxidized
G. Haxel (unpublished)	AZ, USA	Sierra Blanca	QT217	32.11	-112.76	672.721	0.3779	0.11	0.450034	0.535984	Very strongly oxidized
G. Haxel (unpublished)	AZ, USA	Sierra Blanca	QT216	32.11	-112.76	673.427	0.2547	0.23	0.459179	0.0443011	Strongly oxidized
G. Haxel (unpublished)	AZ, USA	Sierra Blanca	QT233	32.11	-112.76	717.265	0.2679	0.11	0.351056	0.38658	Strongly oxidized
G. Haxel (unpublished)	AZ, USA	Sierra Blanca	PUP6	32.11	-112.76	653.548	0.2901	0.09	0.351032	0.508305	Very strongly oxidized
G. Haxel (unpublished)	AZ, USA	Sierra Blanca	PR33	32.11	-112.76	748.113	0.1256	0.04	0.153015	0.49693	Very strongly oxidized
G. Haxel (unpublished)	AZ, USA	Sierra Blanca	QT107A	32.11	-112.76	671.953	0.1834	0.06	0.225023	0.485248	Very strongly oxidized
G. Haxel (unpublished)	AZ, USA	Sierra Blanca	QT124A	32.11	-112.76	699.256	0.2701	0.09	0.333036	0.477282	Very strongly oxidized
Shaw and Guilbert (1990)	AZ, USA	Texas Canyon pluton	TC586	32.05	-110.13	797.273	0.8	0.78	1.49984	0.0109954	Strongly oxidized	Texas Canyon	Strongly oxidized	100	797.273
Shaw and Guilbert (1990)	AZ, USA	Dushey Canyon	HQG186	33.81	-113.28	753.173	0.31	0.35	0.628938	-0.0527064	Moderately oxidized	Dushey Canyon 1	Moderately oxidized	50	753.173
Shaw and Guilbert (1990)	AZ, USA	Dushey Canyon	HQG286	33.81	-113.28	1002.96	0.52	0.54	1.0079	-0.0163904	Strongly oxidized	Dushey Canyon 2	Strongly oxidized	50	1002.96
Force (1997)	AZ, USA	Wilderness pluton	Spencer sill	32.3	-111.35		0.81	0.75	1.47884	0.0334238	Strongly oxidized	Wilderness 1	Strongly oxidized	92.8571
Force (1997)	AZ, USA	Wilderness pluton	Wildernes Sill	32.3	-111.35		0.51	0.4	0.858898	0.10551	Strongly oxidized	Wilderness 2	Moderately oxidized	7.14286
Force (1997)	AZ, USA	Wilderness pluton	Wildernes Sill	32.3	-111.35		0.46	0.25	0.663908	0.264818	Strongly oxidized
Force (1997)	AZ, USA	Wilderness pluton	Wildernes Sill	32.3	-111.35		0.24	0.24	0.455952	0	Strongly oxidized
Force (1997)	AZ, USA	Wilderness pluton	Wildernes Sill	32.3	-111.35		0.48	0.35	0.781904	0.137173	Strongly oxidized
Force (1997)	AZ, USA	Wilderness pluton	Wildernes Sill	32.3	-111.35		0.43	0.32	0.706914	0.128318	Strongly oxidized
Force (1997)	AZ, USA	Wilderness pluton	inclsuion zone	32.3	-111.35		0.52	0.21	0.677896	0.393784	Strongly oxidized
Force (1997)	AZ, USA	Wilderness pluton	inclsuion zone	32.3	-111.35		0.48	0.37	0.801904	0.11304	Strongly oxidized
Force (1997)	AZ, USA	Wilderness pluton	Catnip sill	32.3	-111.35		0.75	0.51	1.18485	0.167491	Strongly oxidized
Keith and Reynolds (1980)	AZ, USA	Wilderness pluton	Seven_Falls	32.3	-111.35		0.81	1.42	2.14884	-0.243803	Moderately oxidized
Keith and Reynolds (1980)	AZ, USA	Wilderness pluton	Lower Foliated Bio Granite	32.3	-111.35		1.012	0.682	1.5926	0.171396	Strongly oxidized
Keith and Reynolds (1980)	AZ, USA	Wilderness pluton	Upper 2-mica granite	32.3	-111.35		0.5	0.39	0.8399	0.107905	Strongly oxidized
Keith and Reynolds (1980)	AZ, USA	Wilderness pluton	Lemmon Rock leucogranite	32.3	-111.35		0.29	0.195	0.455942	0.172363	Strongly oxidized
Keith and Reynolds (1980)	AZ, USA	Wilderness pluton	Garnet schlieren	32.3	-111.35		1.51	1.39	2.7487	0.0359621	Strongly oxidized
Shaw and Guilbert (1990)	AZ, USA	White Tank	WT286	33.55	-112.7	764.563	0.19	0.46	0.630962	-0.384004	Moderately reduced	White Tank 1	Strongly oxidized	33.3333	688.062
Shaw and Guilbert (1990)	AZ, USA	White Tank	WT3C86	33.55	-112.7	725.702	0.31	0.34	0.618938	-0.0401172	Moderately oxidized	White Tank 2	Moderately oxidized	55.5556	721.016
Shaw and Guilbert (1990)	AZ, USA	White Tank	TW586	33.55	-112.7	709.996	0.28	0.25	0.501944	0.049218	Strongly oxidized	White Tank 3	Moderately reduced	11.1111	764.563
Shaw and Guilbert (1990)	AZ, USA	White Tank	WT686	33.55	-112.7	695.537	0.17	0.21	0.362966	-0.0917704	Moderately oxidized
Shaw and Guilbert (1990)	AZ, USA	White Tank	WT786	33.55	-112.7	781.337	0.28	0.57	0.821944	-0.308717	Moderately oxidized
Shaw and Guilbert (1990)	AZ, USA	White Tank	WT8A86	33.55	-112.7	735.253	0.46	0.29	0.703908	0.20036	Strongly oxidized
Shaw and Guilbert (1990)	AZ, USA	White Tank	WT8B86	33.55	-112.7	773.806	0.32	0.48	0.767936	-0.176091	Moderately oxidized
Shaw and Guilbert (1990)	AZ, USA	White Tank	WT186	33.55	-112.7	628.696	0.05	0.07	0.11499	-0.146128	Moderately oxidized
Shaw and Guilbert (1990)	AZ, USA	White Tank	WT1186	33.55	-112.7	618.936	0.08	0.05	0.121984	0.20412	Strongly oxidized
Best et al. (1974)	NV, USA	Tungstonia pluton	8	39.1	-114.19		0.15	1.62	1.75497	-1.03342	Moderately reduced	Tungstonia 1	Moderately oxidized	40
Best et al. (1974)	NV, USA	Tungstonia pluton	9AB	39.1	-114.19		0.3	0.57	0.83994	-0.278754	Moderately oxidized	Tungstonia 2	Moderately reduced	60	705.671
Best et al. (1974)	NV, USA	Tungstonia pluton	9B	39.1	-114.19		0.28	0.83	1.08194	-0.47192	Moderately reduced
Best et al. (1974)	NV, USA	Tungstonia pluton	40	39.1	-114.19		0.33	0.52	0.816934	-0.197489	Moderately oxidized
Lee et al. (1981)	NV, USA	Tungstonia pluton	244-MW-60	39.1	-114.19	705.671	0.25	0.63	0.85495	-0.401401	Moderately reduced
Lee and Van Loenen (1971)	NV, USA	Pole Canyon pluton	88	39.1	-114.21	740.146	0.72	0.24	0.887856	0.477121	Very strongly oxidized	Pole Canyon 1	Very strongly oxidized	11.1111	740.146
Lee and Van Loenen (1971)	NV, USA	Pole Canyon pluton	89	39.1	-114.21	740.53	1.2	0.77	1.84976	0.192691	Strongly oxidized	Pole Canyon 2	Strongly oxidized	77.7778	741.755
Lee and Van Loenen (1971)	NV, USA	Pole Canyon pluton	90	39.1	-114.21	712.749	0.54	0.95	1.43589	-0.24533	Moderately oxidized	Pole Canyon 3	Moderately oxidized	11.1111	712.749
Lee and Van Loenen (1971)	NV, USA	Pole Canyon pluton	91	39.1	-114.21	732.391	0.68	0.38	0.991864	0.252725	Strongly oxidized
Lee and Van Loenen (1971)	NV, USA	Pole Canyon pluton	92	39.1	-114.21	710.248	0.78	0.38	1.08184	0.312311	Strongly oxidized
Lee and Van Loenen (1971)	NV, USA	Pole Canyon pluton	93	39.1	-114.21	728.976	0.88	0.38	1.17182	0.364699	Strongly oxidized
Lee and Van Loenen (1971)	NV, USA	Pole Canyon pluton	94	39.1	-114.21	734.674	0.48	0.4	0.831904	0.0791812	Strongly oxidized
Lee and Van Loenen (1971)	NV, USA	Pole Canyon pluton	95	39.1	-114.21	756.074	0.85	0.32	1.08483	0.424269	Strongly oxidized
Lee and Van Loenen (1971)	NV, USA	Pole Canyon pluton	96	39.1	-114.21	789.394	2.2	0.2	2.17956	1.04139	Strongly oxidized
John and Wooden (1990)	CA, USA	Chemehuevi	H80Ch-307	34.55	-114.52	769.172	2.27	1.42	3.46255	0.203738	Strongly oxidized	Chemehuevi 1	Strongly oxidized	78.2609	775.752
John and Wooden (1990)	CA, USA	Chemehuevi	H80Ch-305	34.55	-114.52	804.12	2.36	2.86	4.98353	-0.083454	Strongly oxidized	Chemehuevi 2	Moderately oxidized	13.0435	776.838
John and Wooden (1990)	CA, USA	Chemehuevi	BJ80CH-194	34.55	-114.52		2.6	3.47	5.80948	-0.125356	Moderately oxidized	Chemehuevi 3	Moderately reduced	8.69565	732.747
John and Wooden (1990)	CA, USA	Chemehuevi	BJ81Ch-72 (1)	34.55	-114.52	811.304	2.56	2.06	4.36349	0.0943727	Strongly oxidized
John and Wooden (1990)	CA, USA	Chemehuevi	BJ81Ch-72	34.55	-114.52	798.066	1.86	1.98	3.65363	-0.0271522	Strongly oxidized
John and Wooden (1990)	CA, USA	Chemehuevi	BJ82Ch-103	34.55	-114.52	787.431	1.82	1.29	2.92764	0.149482	Strongly oxidized
John and Wooden (1990)	CA, USA	Chemehuevi	BJ81Ch-306	34.55	-114.52	810.367	1.4	1.29	2.54972	0.0355383	Strongly oxidized
John and Wooden (1990)	CA, USA	Chemehuevi	BJ82Ch-81	34.55	-114.52	776.26	1.62	0.98	2.43768	0.218289	Strongly oxidized
John and Wooden (1990)	CA, USA	Chemehuevi	BJ80Ch-241^1	34.55	-114.52	776.617	1.06	0.78	1.73379	0.133211	Strongly oxidized
John and Wooden (1990)	CA, USA	Chemehuevi	BJ81Ch-64	34.55	-114.52	773.797	0.76	0.74	1.42385	0.0115819	Strongly oxidized
John and Wooden (1990)	CA, USA	Chemehuevi	BJ81Ch-113 (1)	34.55	-114.52	780.168	0.93	1.1	1.93681	-0.0729097	Strongly oxidized
John and Wooden (1990)	CA, USA	Chemehuevi	BJ81Ch-113 (2)	34.55	-114.52	790.088	0.73	1.18	1.83685	-0.208559	Moderately oxidized
John and Wooden (1990)	CA, USA	Chemehuevi	H80Ch-308^1	34.55	-114.52	763.587	0.49	1.05	1.4909	-0.330993	Moderately oxidized
John and Wooden (1990)	CA, USA	Chemehuevi	BJ80Ch-200^1	34.55	-114.52	760.845	0.77	0.57	1.26285	0.130616	Strongly oxidized
John and Wooden (1990)	CA, USA	Chemehuevi	H81Mh-61	34.55	-114.52	721.853	0.39	1.21	1.56092	-0.491721	Moderately reduced
John and Wooden (1990)	CA, USA	Chemehuevi	H80Mh-310^1	34.55	-114.52	788.57	0.91	0.68	1.49882	0.126532	Strongly oxidized
John and Wooden (1990)	CA, USA	Chemehuevi	P80Ch-55^1	34.55	-114.52	755.598	0.77	0.35	1.04285	0.342423	Strongly oxidized
John and Wooden (1990)	CA, USA	Chemehuevi	BJ81Ch-46	34.55	-114.52		0.52	0.46	0.927896	0.0532455	Strongly oxidized
John and Wooden (1990)	CA, USA	Chemehuevi	BJ81Ch-61	34.55	-114.52	766.236	0.45	0.45	0.85491	0	Strongly oxidized
John and Wooden (1990)	CA, USA	Chemehuevi	BJ81Ch-5	34.55	-114.52	755.457	0.45	0.31	0.71491	0.161851	Strongly oxidized
John and Wooden (1990)	CA, USA	Chemehuevi	BJ81Ch-22	34.55	-114.52	708.374	0.2	0.25	0.42996	-0.09691	Strongly oxidized
John and Wooden (1990)	CA, USA	Chemehuevi	BJ84Ch-9	34.55	-114.52	743.641	0.08	0.19	0.261984	-0.375664	Moderately reduced
John and Wooden (1990)	CA, USA	Chemehuevi	MJ82Ch-1	34.55	-114.52	765.401	0.4	0.17	0.52992	0.371611	Strongly oxidized
John and Wooden (1990)	CA, USA	Whale Mtn.	BJ81Ch-103	34.68	-114.54	729.566	2.51	5.71	7.9685	-0.356962	Moderately oxidized	Whale Mtn. 1	Strongly oxidized	37.5	810.812
John and Wooden (1990)	CA, USA	Whale Mtn.	BJ81Ch-103	34.68	-114.54	753.596	3.69	5.52	8.84026	-0.174913	Strongly oxidized	Whale Mtn. 2	Moderately oxidized	62.5	739.376
John and Wooden (1990)	CA, USA	Whale Mtn.	BJ81Ch-2	34.68	-114.54	701.539	2.62	4.96	7.31748	-0.27718	Moderately oxidized
John and Wooden (1990)	CA, USA	Whale Mtn.	H80Mh-311	34.68	-114.54	634.833	1.76	5.14	6.72365	-0.46545	Moderately oxidized
John and Wooden (1990)	CA, USA	Whale Mtn.	BJ81Ch-106	34.68	-114.54	891.568	2.12	3.28	5.18758	-0.189538	Moderately oxidized
John and Wooden (1990)	CA, USA	Whale Mtn.	BJ81Ch-3	34.68	-114.54	869.379	2.53	2.84	5.11649	-0.0501978	Strongly oxidized
John and Wooden (1990)	CA, USA	Whale Mtn.	BJ81Ch-308	34.68	-114.54		1.2	3.2	4.27976	-0.425969	Moderately oxidized
John and Wooden (1990)	CA, USA	Whale Mtn.	BJ80Ch-198^1	34.68	-114.54	809.462	1.52	1.47	2.8377	0.0145263	Strongly oxidized
G. Haxel (unpublished)	SON, Mexico	Mezquital	2H126	30.9	-111.88	729.422	0.4219	0.71	1.08963	-0.226049	Moderately oxidized	Mezquital	Moderately oxidized	100	729.422
G. Haxel (unpublished)	SON, Mexico	Presumido Peak pluton	2H12	31.5	-111.62	780.973	0.8777	0.93	1.71975	-0.0251369	Moderately oxidized	Presumido Peak 1	Very strongly oxidized	39.4737	735.792
G. Haxel (unpublished)	SON, Mexico	Presumido Peak pluton	SP239B	31.5	-111.62	773.677	1.486	0.4	1.7371	0.569959	Very strongly oxidized	Presumido Peak 2	Strongly oxidized	50	707.226
G. Haxel (unpublished)	SON, Mexico	Presumido Peak pluton	SP651	31.5	-111.62	785.084	2.0399	0.91	2.7455	0.350567	Strongly oxidized	Presumido Peak 3	Moderately oxidized	7.89474	710.606
G. Haxel (unpublished)	SON, Mexico	Presumido Peak pluton	2H21	31.5	-111.62	727.365	0.6725	0.25	0.855115	0.429752	Strongly oxidized	Presumido Peak 4	Strongly reduced	2.63158	693.577
G. Haxel (unpublished)	SON, Mexico	Presumido Peak pluton	PUP41	31.5	-111.62	761.352	0.9204	0.36	1.18818	0.407674	Strongly oxidized
G. Haxel (unpublished)	SON, Mexico	Presumido Peak pluton	GH2-27	31.5	-111.62	699.216	0.5693	0.37	0.882256	0.187139	Strongly oxidized
G. Haxel (unpublished)	SON, Mexico	Presumido Peak pluton	2H14	31.5	-111.62	712.203	0.7679	0.11	0.800956	0.843912	Very strongly oxidized
G. Haxel (unpublished)	SON, Mexico	Presumido Peak pluton	GH2-26	31.5	-111.62	706.819	0.4203	0.27	0.648186	0.192196	Strongly oxidized
G. Haxel (unpublished)	SON, Mexico	Presumido Peak pluton	2H7	31.5	-111.62	673.657	0.5946	0.14	0.675021	0.628097	Very strongly oxidized
G. Haxel (unpublished)	SON, Mexico	Presumido Peak pluton	CM178	31.5	-111.62	809.656	0.8602	0.18	0.954008	0.679327	Very strongly oxidized
G. Haxel (unpublished)	SON, Mexico	Presumido Peak pluton	SP220	31.5	-111.62	709.957	0.4636	0.24	0.657147	0.285932	Strongly oxidized
G. Haxel (unpublished)	SON, Mexico	Presumido Peak pluton	SP240	31.5	-111.62	725.334	0.4879	0.11	0.549012	0.646938	Very strongly oxidized
G. Haxel (unpublished)	SON, Mexico	Presumido Peak pluton	CM170	31.5	-111.62	802.719	0.8236	0.24	0.981075	0.535505	Very strongly oxidized
G. Haxel (unpublished)	SON, Mexico	Presumido Peak pluton	CM161	31.5	-111.62	693.577	0.0225	0.25	0.270245	-1.04576	Strongly reduced
G. Haxel (unpublished)	SON, Mexico	Presumido Peak pluton	SP136A	31.5	-111.62	645.807	0.1936	0.24	0.414201	-0.0933059	Moderately oxidized
G. Haxel (unpublished)	SON, Mexico	Presumido Peak pluton	CM169	31.5	-111.62	786.702	0.739	0.1	0.764952	0.868644	Very strongly oxidized
G. Haxel (unpublished)	SON, Mexico	Presumido Peak pluton	GH2-28	31.5	-111.62	714.557	0.3224	0.16	0.450096	0.304275	Strongly oxidized
G. Haxel (unpublished)	SON, Mexico	Presumido Peak pluton	SP221	31.5	-111.62	705.038	0.237	0.3	0.513253	-0.102373	Moderately oxidized
G. Haxel (unpublished)	SON, Mexico	Presumido Peak pluton	SP217	31.5	-111.62	684.993	0.4579	0.11	0.522018	0.619378	Very strongly oxidized
G. Haxel (unpublished)	SON, Mexico	Presumido Peak pluton	2H28	31.5	-111.62	725.975	0.3412	0.08	0.387012	0.629919	Very strongly oxidized
G. Haxel (unpublished)	SON, Mexico	Presumido Peak pluton	2H2	31.5	-111.62	723.825	0.3113	0.17	0.450108	0.26273	Strongly oxidized
G. Haxel (unpublished)	SON, Mexico	Presumido Peak pluton	SP238	31.5	-111.62	740.235	0.4505	0.45	0.85536	0.000482282	Strongly oxidized
G. Haxel (unpublished)	SON, Mexico	Presumido Peak pluton	SP239C	31.5	-111.62	721.163	0.3857	0.13	0.477053	0.472306	Strongly oxidized
G. Haxel (unpublished)	SON, Mexico	Presumido Peak pluton	2H25	31.5	-111.62	689.593	0.1301	0.09	0.207064	0.160035	Strongly oxidized
G. Haxel (unpublished)	SON, Mexico	Presumido Peak pluton	SP128A	31.5	-111.62	701.614	0.4479	0.11	0.51302	0.609788	Very strongly oxidized
G. Haxel (unpublished)	SON, Mexico	Presumido Peak pluton	SP640	31.5	-111.62	679.459	0.1835	0.15	0.315113	0.0875448	Strongly oxidized
G. Haxel (unpublished)	SON, Mexico	Presumido Peak pluton	SP130A	31.5	-111.62	614.44	0.5823	0.07	0.593954	0.920049	Very strongly oxidized
G. Haxel (unpublished)	SON, Mexico	Presumido Peak pluton	SP661D	31.5	-111.62	655.983	0.189	0.1	0.270062	0.276462	Strongly oxidized
G. Haxel (unpublished)	SON, Mexico	Presumido Peak pluton	GH2-29	31.5	-111.62	784.442	0.7478	0.02	0.69287	1.57276	Very strongly oxidized
G. Haxel (unpublished)	SON, Mexico	Presumido Peak pluton	2H29	31.5	-111.62	709.152	0.1379	0.11	0.234082	0.0981716	Strongly oxidized
G. Haxel (unpublished)	SON, Mexico	Presumido Peak pluton	SP656	31.5	-111.62	663.156	0.2479	0.11	0.33306	0.352884	Strongly oxidized
G. Haxel (unpublished)	SON, Mexico	Presumido Peak pluton	SP655	31.5	-111.62	699.937	0.389	0.1	0.450022	0.58995	Very strongly oxidized
G. Haxel (unpublished)	SON, Mexico	Presumido Peak pluton	SP241B	31.5	-111.62	674.274	0.1401	0.09	0.216062	0.192196	Strongly oxidized
G. Haxel (unpublished)	SON, Mexico	Presumido Peak pluton	SP135	31.5	-111.62	766.709	0.6201	0.09	0.647966	0.838219	Very strongly oxidized
G. Haxel (unpublished)	SON, Mexico	Presumido Peak pluton	SP634	31.5	-111.62	653.393	0.1802	0.18	0.342144	0.000482282	Strongly oxidized
G. Haxel (unpublished)	SON, Mexico	Presumido Peak pluton	CM155	31.5	-111.62	774.826	0.519	0.1	0.566996	0.715167	Very strongly oxidized
G. Haxel (unpublished)	SON, Mexico	Presumido Peak pluton	SP128C	31.5	-111.62	728.509	0.5569	0.21	0.711099	0.423558	Strongly oxidized
G. Haxel (unpublished)	SON, Mexico	Presumido Peak pluton	SP95	31.5	-111.62	694.203	0.2936	0.24	0.504181	0.0875448	Strongly oxidized

## Sheet: References
References
Bateman, P. C., Pakiser, L. C., & Kane, M. F. (1965). Geology and tungsten mineralization of the Bishop district, California, with a section on gravity study of Owens Valley and a section on seismic profile (No. 470). US Govt. Print. Off.,.
Best, M. G., & Brimhall, W. H. (1974). Late Cenozoic alkalic basaltic magmas in the western Colorado Plateaus and the Basin and Range transition zone, USA, and their bearing on mantle dynamics. Geological Society of America Bulletin, 85(11), 1677-1690.
Chapman, J. B., Runyon, S. E., Shields, J., Lawler, B. L., Pridmore, C. J., Scoggin, S. H., ... & Haxel, G. B. (2021). The North American Cordilleran Anatectic Belt. Earth-Science Reviews, 103576.
Force, E. R. (1997). Geology and mineral resources of the Santa Catalina Mountains, southeastern Arizona: A cross-sectional approach.
Hart, C. J., Mair, J. L., Goldfarb, R. J., & Groves, D. I. (2004). Source and redox controls on metallogenic variations in intrusion-related ore systems, Tombstone-Tungsten Belt, Yukon Territory, Canada. Earth and Environmental Science Transactions of The Royal Society of Edinburgh, 95(1-2), 339-356.
John, B. E., & Wooden, J. (1990). Petrology and geochemistry of the metaluminous to peraluminous Chemehuevi Mountains Plutonic Suite, southeastern California. The Nature and Origin of Cordilleran Magmatism. Geological Society of America, Memoir, 174, 71-98.
Keith, S. B., & Reynolds, S. J. (1980). Geochemistry of Cordilleran metamorphic core complexes. Cordilleran metamorphic core complexes and their uranium favorability: US Department of Energy Open-File Report GJBX-256 (80), 321.
Lee, D. E., & Van Loenen, R. E. (1971). Hybrid granitoid rocks of the southern Snake Range, Nevada (pp. 1-46). US Government Printing Office.
Lee, D. E., Kistler, R. W., Friedman, I., & Van Loenen, R. E. (1981). Two‐mica granites of northeastern Nevada. Journal of Geophysical Research: Solid Earth, 86(B11), 10607-10616.
Rasmussen, K.L. (2013) The timing, composition, and petrogenesis of syn- to post-accretionary magmatism in the northern Cordilleran miogeocline, eastern Yukon and southwestern Northwest Territories. Ph.D. Thesis, University of British Columbia, Vancouver, British Columbia, Canada, 788 pp.
Shaw, A. L., Guilbert, J. M., Stein, H. J., & Hannah, J. L. (1990). Geochemistry and metallogeny of Arizona peraluminous granitoids with reference to Appalachian and European occurrences. Ore-bearing granite systems: petrogenesis and mineralizing processes, Geol Soc Am Spec Paper, 246, 317-356.

## Sheet: G49801
Elongo, V., et al., 2022, Ancient roots of tungsten in western North America: Geology, v. 50, https://doi.org/10.1130/G49801.1
